# Supplementary material for: Cancer-driven dynamics of immune cells in a microfluidic environment
Source: PubMed Central journal article supplement — Sci Rep. 2014 Oct 16;4:6639. doi: 10.1038/srep06639 (PMC5377582; doi:10.1038/srep06639), 2014-10-16
Supplement: srep06639-s1.pdf [file srep06639-s1.pdf]

# Cancer-driven dynamics of immune cells: Mathematical Appendix

Elena Agliari,<sup>1</sup> Elena Biselli,<sup>1</sup> Adele De Ninno,<sup>2</sup> Giovanna Schiavoni,<sup>3</sup> Lucia Gabriele,<sup>3</sup> Anna Gerardino,<sup>4</sup> Fabrizio Mattei,<sup>3</sup> Adriano Barra,<sup>1</sup> and Luca Businaro<sup>4</sup>

<sup>1</sup>*Dipartimento di Fisica, Sapienza Università di Roma*

<sup>2</sup>*UCBM-CNR Joint Lab for Nanotechnologies for the Life Sciences, Università Campus Bio-Medico di Roma, Rome, Italy*

<sup>3</sup>*Istituto Superiore di Sanità, Dept. of Hematology, Oncology and Molecular Medicine, Roma*

<sup>4</sup>*Istituto di Fotonica e Nanotecnologie, Consiglio Nazionale delle Ricerche, Roma*

PACS numbers:

In the main text, paths performed by splenocytes are modeled by means of random walks characterized by (synchronized) discrete time steps and moving on a continuous two-dimensional space ( $xy$ ). This kind of random walks can be described in terms of a probability distribution  $p(\mathbf{r}, t)$  giving the probability that the walker has covered a distance  $\mathbf{r}$  in a time  $t$ . In fact, we can write

$$p(\mathbf{r}, t + \tau) = \int_{-\infty}^{\infty} p(\mathbf{r}', t) \psi(\mathbf{r} - \mathbf{r}', t) d\mathbf{r}', \quad (1)$$

where  $\psi(\mathbf{r} - \mathbf{r}', t)$  is the probability that at time  $t$  a step from  $\mathbf{r}'$  to  $\mathbf{r}$  is performed. For time-homogeneous processes, the width and the direction of a step do not depend on time and the dependence on  $t$  can be dropped, i.e.  $\psi(\mathbf{r} - \mathbf{r}', t) = \psi(\mathbf{r} - \mathbf{r}')$ . Moreover, by exploiting the discreteness of time steps, the time  $t$  at which any step occurs is a multiple of  $\tau$  in such a way that we can write

$$p(\mathbf{r}, n + 1) = \int_{-\infty}^{\infty} p(\mathbf{r}', n) \psi(\mathbf{r} - \mathbf{r}') d\mathbf{r}', \quad (2)$$

$n$  being the number of steps performed up to the time considered and  $t = \tau n$ .

As anticipated (see Results in the main paper), the distribution  $\psi(\mathbf{r} - \mathbf{r}')$  qualitatively controls the resulting random walk, possibly giving rise to deterministic walks (e.g.  $\psi(\mathbf{r} - \mathbf{r}') = \delta_{\mathbf{r} - \mathbf{r}', \mathbf{k}}$ ,  $\mathbf{k} \neq \mathbf{0}$ , corresponding to a ballistic motion), to correlated walks (e.g.  $\psi(\mathbf{r} - \mathbf{r}') = f(\mathbf{r} \cdot \mathbf{r}')$ , where  $f$  is a peaked function, corresponding to a motion with a preferred direction), to completely stochastic walks (e.g.  $\psi(\mathbf{r} - \mathbf{r}') = \delta_{|\mathbf{r} - \mathbf{r}'|, \tilde{r}}$ , corresponding to an isotropic motion where steps have fixed length  $\tilde{r}$ ), etc [1].

In Euclidean structures, like the two-dimensional substrate considered here, we can decompose  $\mathbf{r}$  into its normal coordinates, i.e.  $\mathbf{r} = (x, y)$ , and, analogously  $\mathbf{r} - \mathbf{r}' = (x - x', y - y') \equiv (\Delta x, \Delta y)$ . Therefore, Eq. 2 can be rewritten as

$$p((x, y), n + 1) = \int_{-\infty}^{\infty} \int_{-\infty}^{\infty} p((x', y'), n) \psi(\Delta x, \Delta y) dx' dy', \quad (3)$$

and, assuming that  $\Delta x$  and  $\Delta y$  are independent,  $\psi(\Delta x, \Delta y)$  can be factorized as  $\psi(\Delta x, \Delta y) = \psi_x(\Delta x) \psi_y(\Delta y)$ .

As suggested by Eq. 3, the knowledge of the specific distribution  $\psi(\Delta x, \Delta y)$  possibly allows to get an explicit expression for  $p((x, y), n)$ .

For instance, one can show that, when diffusion is isotropic, i.e. it is equal in the  $x$  and  $y$  directions, any distribution  $\psi(\Delta x, \Delta y)$  fulfilling the central limit theorem asymptotically (resuming the continuous time description) leads to the well-known diffusive limit characterized by the normal distribution [1]

$$p((x, y), t) = \frac{1}{4\pi Dt} e^{-\frac{[(x - v_x t)^2 + (y - v_y t)^2]}{4Dt}} \quad (4)$$

where  $\mathbf{v} = (v_x, v_y)$  accounts for the presence of a drift, while  $D$  is the diffusion-coefficient.

The moments of the distribution are:

$$\langle (x, y) \rangle = (v_x t, v_y t); \quad (5)$$

$$\langle x^2 + y^2 \rangle = v_x^2 t^2 + v_y^2 t^2 + 4Dt, \quad (6)$$

hence, asymptotically, whenever noise is prevailing, we expect to observe a Brownian motion, i.e.  $\mathbf{r} \propto \sqrt{t}$ , while, whenever there is a real presence of a drift (signal), we expect a ballistic motion, i.e.  $\mathbf{r} \propto t$ .

---

[1] Weiss, G.H., Aspects and applications of random walks, (North-Holl. Press, Amsterdam, 1994).
